# Supplementary material for: Rethinking Aid Allocation: Analysis of Official Development Spending on Modern Pollution Reduction
Source: PubMed Central journal article supplement (PMC6838771; doi:10.5334/aogh.2633), 2019-11-07
Supplement: agh-85-1-2633-s1.pdf [file agh-85-1-2633-s1.pdf]

**Annex I**

| <b>Country/Organization</b> | <b>Aid Agency(s) Included</b>                                                                           |
|-----------------------------|---------------------------------------------------------------------------------------------------------|
| <i>Australia</i>            | Department of Foreign Affairs and Trade (DFAT)                                                          |
| <i>Austria</i>              | Austria Development Agency (ADA)                                                                        |
| <i>Belgium</i>              | Belgian Development Agency (Enabel)                                                                     |
| <i>Canada</i>               | Global Affairs Canada                                                                                   |
| <i>Czech Republic</i>       | Ministry of Foreign Affairs of the Czech Republic                                                       |
| <i>Denmark</i>              | Danish Development Corporation                                                                          |
| <i>European Union</i>       | EU International Cooperation and Development                                                            |
| <i>Finland</i>              | Ministry of Foreign Affairs of Finland                                                                  |
| <i>France</i>               | Agency Française de Développement (AFD); Fonds Français Pour l'Environnement Mondial (FFEM)             |
| <i>Germany</i>              | Deutsche Gesellschaft für Internationale Zusammenarbeit (GIZ)                                           |
| <i>Greece</i>               | Hellenic Aid, Ministry of Foreign Affairs of Greece                                                     |
| <i>Hungary</i>              | Ministry of Foreign Affairs and Trade                                                                   |
| <i>Iceland</i>              | International Development Cooperation (Iceida)                                                          |
| <i>Ireland</i>              | Irish Aid                                                                                               |
| <i>Italy</i>                | Italian Agency for Development Cooperation (AICS)                                                       |
| <i>Japan</i>                | Japan International Cooperation Agency (JICA), Environmental Restoration and Conservation Agency (ERCA) |
| <i>Korea</i>                | Korean International Cooperation Agency (KOICA)                                                         |
| <i>Luxembourg</i>           | LuxDev                                                                                                  |
| <i>The Netherlands</i>      | Government of Netherlands Development Cooperation                                                       |

## Development Spending on Modern Pollution

|                        |                                                                  |
|------------------------|------------------------------------------------------------------|
| <i>New Zealand</i>     | New Zealand Foreign Affairs and Trade                            |
| <i>Norway</i>          | The Norwegian Agency for Development Cooperation (NORAD)         |
| <i>Poland</i>          | Polish Aid                                                       |
| <i>Portugal</i>        | Ministry of Foreign Affairs                                      |
| <i>Slovak Republic</i> | Slovak Aid                                                       |
| <i>Slovenia</i>        | International Development Cooperation of Slovenia                |
| <i>Spain</i>           | Spanish Agency for International Development Cooperation (Aecid) |
| <i>Sweden</i>          | Swedish Aid                                                      |
| <i>Switzerland</i>     | Swiss Development Cooperation                                    |
| <i>United Kingdom</i>  | Department for International Development (DFID)                  |
| <i>United States</i>   | United States Agency for International Development (USAID)       |
